# Supplementary material
Source: PubMed Central journal article supplement (PMC5695862)
Supplement: NIHMS918952-supplement-Supplemental_table.pdf [file NIHMS918952-supplement-Supplemental_table.pdf]

Supplemental Table 1: Unadjusted Receipt of Aggressive End of Life Care in Last Month of Life (n=4,521)

|                                                       | Total |      | Survival Time<br>(Time from Diagnosis Until Death) |      |                |                |            |      | P-Value |
|-------------------------------------------------------|-------|------|----------------------------------------------------|------|----------------|----------------|------------|------|---------|
|                                                       | N     | %    | ≤6 months                                          |      | 6-12 months    |                | >12 months |      |         |
|                                                       |       |      | N                                                  | %    | N              | %              | N          | %    |         |
|                                                       | 4,521 | 100  | 1,752                                              | 38.8 | 729            | 16.1           | 2,040      | 45.1 |         |
| <b>Median Survival (months)</b>                       | 9.8   |      | 2.5                                                |      | 8.6            |                | 27.2       |      |         |
| <b>Hospital</b>                                       |       |      |                                                    |      |                |                |            |      |         |
| Any Hospitalization measure                           | 1,306 | 28.9 | 620                                                | 35.4 | 174            | 23.9           | 512        | 25.1 | <0.0001 |
| ED Visit                                              | 641   | 14.2 | 260                                                | 14.8 | 87             | 11.9           | 294        | 14.4 | 0.15    |
| Hospitalization                                       | 762   | 16.9 | 372                                                | 21.2 | 97             | 13.3           | 372        | 21.2 | <0.0001 |
| Hospital LOS >14 days                                 | 556   | 12.3 | 304                                                | 17.4 | 73             | 10.0           | 179        | 8.8  | <0.0001 |
| Mean LOS (days)                                       | 10.0  |      | 10.9                                               |      | 9.2            |                | 9.1        |      | <0.0001 |
| <b>Intensive Care Unit</b>                            |       |      |                                                    |      |                |                |            |      |         |
| ICU admission                                         | 742   | 16.4 | 330                                                | 18.8 | 104            | 14.3           | 308        | 15.1 | 0.002   |
| Mean ICU LOS (days)                                   | 4.5   |      | 5.0                                                |      | 4.3            |                | 4.2        |      | 0.09    |
| <b>Hospice</b>                                        |       |      |                                                    |      |                |                |            |      |         |
| Hospice initiated within 3 days of death              | 378   | 8.4  | 146                                                | 8.3  | 57             | 7.8            | 175        | 8.6  | 0.82    |
| Hospice LOS (days)                                    | 10.9  |      | 10.9                                               |      | 11.0           |                | 10.8       |      | 0.97    |
| <b>Other Measures</b>                                 |       |      |                                                    |      |                |                |            |      |         |
| IV Chemotherapy within last 14 days of life           | 391   | 8.7  | 131                                                | 7.5  | 65             | 8.9            | 195        | 9.6  | 0.07    |
| ≥10 Physician encounters in the last 6 months of life | 2,052 | 45.4 | 892                                                | 50.9 | 335            | 46.0           | 825        | 40.4 | <0.0001 |
| <b>Any Life Sustaining Measure</b>                    |       |      |                                                    |      |                |                |            |      |         |
| Feeding Tube                                          | 61    | 1.4  | 31                                                 | 1.8  | - <sup>a</sup> | - <sup>a</sup> | 25         | 1.2  | 0.08    |
| Ventilation                                           | 267   | 5.9  | 126                                                | 7.2  | 42             | 5.8            | 99         | 4.9  | 0.01    |
| Resuscitation                                         | 62    | 1.4  | 28                                                 | 1.6  | 14             | 1.9            | 20         | 1.0  | 0.10    |
| <b>Any Aggressive EOL Care</b>                        | 2,748 | 60.8 | 1,177                                              | 67.2 | 415            | 56.9           | 1,156      | 56.7 | <0.0001 |

<sup>a</sup>n<11
